# Supplementary material
Source: PubMed Central journal article supplement (PMC3592521)
Supplement: SD1.pdf [file SD1.pdf]

SUPPLEMENTAL TABLE 1

Crude and multiple-adjusted odds ratios for anemia among study children from Kwale County stratified by sex

| Independent variables                      | Boys       |             |                 |                    | Girls      |             |                 |              |
|--------------------------------------------|------------|-------------|-----------------|--------------------|------------|-------------|-----------------|--------------|
|                                            | Crude OR   | Adjusted OR | 95% CI          | P value            | Crude OR   | Adjusted OR | 95% CI          | P value      |
| Age 5–6 years*                             | 1.7        | <b>2.1</b>  | <b>1.1, 4.1</b> | <b>0.026</b>       | 1.3        | 1.2         | 0.6, 2.3        | 0.61         |
| Age 7–8 years*                             | 0.95       | 1.1         | 0.6, 2.1        | 0.771              | 0.6        | <b>0.5</b>  | <b>0.2, 0.9</b> | <b>0.029</b> |
| Age 9–10 years*                            | 0.7        | 0.76        | 0.4, 1.45       | 0.413              | 0.7        | 0.6         | 0.3, 1.2        | 0.130        |
| Age 11–12 years*                           | 0.9        | 0.95        | 0.5, 1.8        | 0.895              | 0.6        | 0.56        | 0.3, 1.1        | 0.091        |
| Age 13–14 years*                           | 0.8        | 0.92        | 0.49, 1.7       | 0.793              | 0.95       | <b>0.8</b>  | 0.4, 1.7        | 0.650        |
| Age 15–16 years*                           | 1.1        | 1.21        | 0.6, 2.4        | 0.574              | 0.7        | 0.7         | 0.3, 1.3        | 0.269        |
| <i>S. haematobium</i> (heavy intensity)†   | <b>1.7</b> | <b>2</b>    | <b>1.3, 2.9</b> | <b>&lt; 0.0001</b> | <b>1.7</b> | <b>1.8</b>  | <b>1.2, 2.7</b> | <b>0.006</b> |
| <i>S. haematobium</i> (light intensity)†   | <b>1.9</b> | <b>1.9</b>  | <b>1.3, 3.0</b> | <b>0.002</b>       | 1.3        | 1.3         | 0.8, 1.9        | 0.251        |
| Hookworm intensity (log egg count + 1)     | –          | 1.1         | 0.98, 1.3       | 0.069              | –          | 1.1         | 0.8, 1.3        | 0.389        |
| <i>P. falciparum</i> malaria‡              | <b>2.2</b> | <b>2.2</b>  | <b>1.3, 3.6</b> | <b>0.002</b>       | 1.4        | 1.3         | 0.8, 2.1        | 0.249        |
| <i>Trichuris</i>                           | 0.97       |             |                 |                    | 1.1        |             |                 |              |
| Filaria                                    | 1.3        | 0.98        | 0.6, 1.6        | 0.954              | 1.4        | 0.7         | 0.4, 1.1        | 0.126        |
| <i>S. haematobium</i> –hookworm‡           | <b>1.6</b> | 1           | 0.6, 1.8        | 0.897              | <b>1.6</b> | 1.03        | 0.5, 2          | 0.921        |
| <i>S. haematobium</i> – <i>Pf</i> malaria‡ | <b>2.4</b> | 0.8         | 0.4, 1.7        | 0.733              | <b>1.7</b> | 1           | 0.5, 2.1        | 0.991        |
| Hookworm– <i>Pf</i> malaria‡               | <b>2.6</b> | 0.9         | 0.4, 2          | 0.896              | 1.5        | 1           | 0.4, 2.4        | 0.996        |
| <i>S. haematobium</i> – <i>Trichuris</i> ‡ | 1.1        |             |                 |                    | 0.9        |             |                 |              |
| <i>S. haematobium</i> –filaria‡            | 1.2        |             |                 |                    | 0.8        |             |                 |              |
| Hookworm– <i>Trichuris</i> ‡               | 0.7        |             |                 |                    | 0.9        |             |                 |              |
| Hookworm–filaria‡                          | 0.5        |             |                 |                    | 0.9        |             |                 |              |
| Poorest SES quintile§                      | <b>1.7</b> | 1.4         | 0.9, 2.2        | 0.099              | 1.2        | 1.1         | 0.7, 1.7        | 0.594        |
| Second poorest SES quintile§               | <b>1.6</b> | 1.3         | 0.9, 2          | 0.195              | 0.9        | 0.83        | 0.6, 1.3        | 0.416        |
| Third poorest SES quintile§‡               | 1.3        | 1.1         | 0.7, 1.7        | 0.631              | 0.8        | 0.8         | 0.5, 1.2        | 0.354        |
| Fourth poorest SES quintile§               | <b>1.9</b> | <b>2.1</b>  | <b>1.3, 3.3</b> | <b>0.001</b>       | 0.94       | 0.97        | 0.6, 1.5        | 0.901        |
| Jego Village                               | 0.86       |             |                 |                    | 0.96       |             |                 |              |
| Milalani Village                           | 1.1        |             |                 |                    | <b>1.4</b> |             |                 |              |
| Nganja Village                             | 0.99       |             |                 |                    | 1.3        |             |                 |              |

Crude odds ratios are presented for all variables explored in initial analysis stratified by sex. Bold variables are those variables that were significantly associated with anemia ( $P < 0.05$ ). Only those variables retained in the final GEE logistic model (accounting for household clustering) are shown with adjusted ORs, 95% CIs, and  $P$  values. Based on their significance compared with nested models, the final model included variables for 2-year age categories, *S. haematobium* intensity categories, hookworm intensity as a numerical variable based on egg count, and the presence or absence of *P. falciparum* malaria, filarial infection, and categorical variables reflecting the presence of coinfections (*S. haematobium*–hookworm, *S. haematobium*–*Pf* malaria, and hookworm–malaria); SES was obtained by analysis of asset scores obtained through PCA with households divided into SES quintiles. Of note, village categories and the *S. haematobium*–*Trichuris*, *S. haematobium*–filaria, hookworm–*Trichuris*, and hookworm–filaria coinfection variables were not included in the final model.

\*Relative to oldest age group (17–18 years).

†Relative to uninfected.

‡Relative to single or no infection.

§Relative to highest (richest) SES.

||Relative to Vuga Village.

SUPPLEMENTAL TABLE 2

Crude and multiple-adjusted odds ratios for wasting among study children from Kwale County, Kenya, stratified by sex

| Independent variables                      | Boys        |             |                  |                    | Girls      |             |                   |                    |
|--------------------------------------------|-------------|-------------|------------------|--------------------|------------|-------------|-------------------|--------------------|
|                                            | Crude OR    | Adjusted OR | 95% CI           | P value            | Crude OR   | Adjusted OR | 95% CI            | P value            |
| Age 5–6 years*                             | <b>0.08</b> | <b>0.08</b> | <b>0.03, 0.2</b> | <b>&lt; 0.0001</b> | <b>0.1</b> | <b>0.13</b> | <b>0.002, 0.3</b> | <b>&lt; 0.0001</b> |
| Age 7–8 years*                             | <b>0.09</b> | <b>0.1</b>  | <b>0.04, 0.2</b> | <b>&lt; 0.0001</b> | <b>0.2</b> | <b>0.2</b>  | <b>0.08, 0.4</b>  | <b>&lt; 0.0001</b> |
| Age 9–10 years*                            | <b>0.15</b> | <b>0.15</b> | <b>0.07, 0.3</b> | <b>&lt; 0.0001</b> | <b>0.3</b> | <b>0.3</b>  | <b>0.01, 0.7</b>  | <b>0.003</b>       |
| Age 11–12 years*                           | <b>0.32</b> | <b>0.36</b> | <b>0.2, 0.7</b>  | <b>0.002</b>       | 0.6        | 0.68        | 0.3, 1.3          | 0.284              |
| Age 13–14 years*                           | 0.6         | 0.62        | 0.3, 1.1         | 0.127              | 0.7        | 0.91        | 0.4, 1.8          | 0.800              |
| Age 15–16 years*                           | 0.7         | 0.78        | 0.4, 1.4         | 0.427              | 1.2        | 1.3         | 0.6, 2.6          | 0.446              |
| <i>S. haematobium</i> (heavy intensity)†   | 1.6         | 1.1         | 0.7, 1.7         | 0.661              | 0.8        | 0.84        | 0.4, 2.6          | 0.603              |
| <i>S. haematobium</i> (light intensity)†   | <b>2</b>    | <b>2.2</b>  | <b>1.2, 4.4</b>  | <b>0.015</b>       | 1.4        | 1.6         | 0.7, 13.2         | 0.280              |
| <i>Pf</i> malaria‡                         | <b>1.8</b>  |             |                  |                    | 1.06       |             |                   |                    |
| <i>S. haematobium</i> – <i>Pf</i> malaria‡ | 0.8         | <b>2.3</b>  | <b>1.1, 4.3</b>  | <b>0.015</b>       | 1.1        | 1.3         | 0.6, 7.7          | 0.421              |
| <i>S. haematobium</i> –filaria‡            | <b>2.2</b>  | 0.7         | 0.3, 1.4         | 0.341              | 0.98       | 1.4         | 0.4, 3            | 0.418              |
| <i>S. haematobium</i> –hookworm‡           | 0.8         |             |                  |                    | 0.6        |             |                   |                    |
| <i>S. haematobium</i> – <i>Trichuris</i> ‡ | 0.98        |             |                  |                    | 0.7        |             |                   |                    |
| Hookworm– <i>Pf</i> malaria‡               | 0.6         |             |                  |                    | 0.7        |             |                   |                    |
| Hookworm– <i>Trichuris</i> ‡               | 0.6         |             |                  |                    | 0.5        |             |                   |                    |
| Hookworm–filaria‡                          | 2.6         |             |                  |                    | 0.5        |             |                   |                    |
| Poorest SES quintile§                      | 1.1         | 1.4         | 0.9, 2.5         | 0.158              | 1.5        | <b>1.9</b>  | <b>1.1, 3.4</b>   | <b>0.033</b>       |
| Second poorest SES quintile§               | 0.8         | 0.87        | 0.5, 1.5         | 0.653              | 0.7        | 0.72        | 0.4, 1.4          | 0.336              |
| Third poorest SES quintile§                | 0.7         | 0.83        | 0.5, 1.4         | 0.529              | 1.2        | 0.94        | 0.5, 1.7          | 0.852              |
| Fourth poorest SES quintile§               | 1.2         | 1.3         | 0.7, 2.1         | 0.362              | 1.4        | 1.4         | 0.8, 2.4          | 0.272              |
| High-risk villages                         | 1           | 1.1         | 0.7, 1.7         | 0.604              | 0.35       | <b>0.34</b> | <b>0.2, 0.6</b>   | <b>&lt; 0.0001</b> |
| Jego Village¶                              | <b>0.3</b>  |             |                  |                    | <b>0.2</b> |             |                   |                    |
| Milalani Village¶                          | <b>0.6</b>  |             |                  |                    | <b>0.2</b> |             |                   |                    |
| Nganja Village¶                            | 0.7         |             |                  |                    | <b>0.3</b> |             |                   |                    |

Crude odds ratios are presented for all variables explored in initial analysis stratified by sex. Bold variables are those variables that were significantly associated with anemia ( $P < 0.05$ ). Only those variables retained in the final GEE logistic model (accounting for household clustering) are shown with adjusted ORs, 95% CIs, and  $P$  values. Based on their significance compared with nested models, the final model included variables for 2-year age categories, *S. haematobium* intensity categories, and categorical variables reflecting the presence of coinfections (*S. haematobium*–filarial and *S. haematobium*–*Pf* malaria); SES was obtained by analysis of asset scores obtained through PCA with households divided into SES quintiles.

\*Relative to oldest age group (17–18 years).

†Relative to uninfected.

‡Relative to single or no infection.

§Relative to highest (richest) SES.

||Relative to low-risk villages (low *S. haematobium* prevalence).

¶Relative to Vuga Village.

SUPPLEMENTAL TABLE 3

Crude and multiple-adjusted odds ratios for stunting among study children from Kwale County, Kenya, stratified by sex

| Independent variables                      | Boys       |             |                  |                    | Girls      |             |                 |              |
|--------------------------------------------|------------|-------------|------------------|--------------------|------------|-------------|-----------------|--------------|
|                                            | Crude OR   | Adjusted OR | 95% CI           | P value            | Crude OR   | Adjusted OR | 95% CI          | P value      |
| Age 5–6 years*                             | <b>0.3</b> | <b>0.3</b>  | <b>0.1, 0.5</b>  | <b>&lt; 0.0001</b> | <b>0.4</b> | <b>0.4</b>  | <b>0.2, 0.8</b> | <b>0.009</b> |
| Age 7–8 years*                             | <b>0.4</b> | <b>0.3</b>  | <b>0.2, 0.6</b>  | <b>&lt; 0.0001</b> | <b>0.4</b> | <b>0.4</b>  | <b>0.2, 0.8</b> | <b>0.014</b> |
| Age 9–10 years*                            | <b>0.6</b> | <b>0.4</b>  | <b>0.2, 0.8</b>  | <b>0.009</b>       | 0.9        | 0.8         | 0.4, 1.7        | 0.645        |
| Age 11–12 years*                           | 0.8        | 0.7         | 0.4, 1.4         | 0.339              | 1.1        | 1.1         | 0.5, 2.3        | 0.705        |
| Age 13–14 years*                           | 0.98       | 1.04        | 0.6, 1.9         | 0.895              | 1.1        | 1.2         | 0.6, 2.4        | 0.637        |
| Age 15–16 years*                           | 1.1        | 1.07        | 0.6, 2.02        | 0.815              | 1.3        | 1.3         | 0.6, 2.6        | 0.506        |
| <i>S. haematobium</i> (heavy intensity)†   | 1.4        | 0.9         | 0.6, 1.2         | 0.448              | <b>0.8</b> | <b>0.6</b>  | <b>0.3, 0.9</b> | <b>0.018</b> |
| <i>S. haematobium</i> (light intensity)†   | <b>1.7</b> | <b>1.6</b>  | <b>1.03, 2.4</b> | <b>0.035</b>       | 0.8        | 0.8         | 0.5, 1.3        | 0.317        |
| Filaria†                                   | 1.4        | 1.3         | 0.8, 2.0         | 0.321              | 1.3        | 1.4         | 0.9, 2.2        | 0.181        |
| Hookworm intensity (log egg count +1)      | 1.04       |             |                  |                    | 0.99       |             |                 |              |
| <i>P. falciparum</i> malaria†              | 0.9        |             |                  |                    | 0.8        |             |                 |              |
| <i>Trichuris</i>                           | 1.1        |             |                  |                    | 1.1        |             |                 |              |
| <i>S. haematobium</i> – <i>Pf</i> malaria‡ | 1.4        | 1.3         | 0.7, 2.3         | 0.377              | <b>1.5</b> | 1.7         | 0.96, 2.9       | 0.065        |
| Hookworm– <i>Trichuris</i> ‡               | 0.5        | 0.5         | 0.2, 1.2         | 0.104              | 0.5        | 0.5         | 0.2, 1.2        | 0.148        |
| <i>S. haematobium</i> –hookworm‡           | 0.9        |             |                  |                    | 0.95       |             |                 |              |
| <i>S. haematobium</i> – <i>Trichuris</i> ‡ | 0.9        |             |                  |                    | 0.97       |             |                 |              |
| <i>S. haematobium</i> –filaria‡            | 1.2        |             |                  |                    | 1.1        |             |                 |              |
| Hookworm– <i>Pf</i> malaria‡               | 1          |             |                  |                    | 0.9        |             |                 |              |
| Hookworm–filaria‡                          | 1.2        |             |                  |                    | 0.7        |             |                 |              |
| Poorest SES quintile§                      | <b>1.8</b> | <b>2.4</b>  | <b>1.5, 3.9</b>  | <b>&lt; 0.0001</b> | <b>1.8</b> | <b>1.9</b>  | <b>1.2, 3.1</b> | <b>0.006</b> |
| Second poorest SES quintile§               | 1.2        | 1.4         | 0.9, 2.3         | 0.144              | 1.2        | 1.2         | 0.7, 2          | 0.391        |
| Third poorest SES quintile§                | 1.1        | 1.4         | 0.9, 2.4         | 0.149              | 0.96       | 0.94        | 0.6, 1.6        | 0.836        |
| Fourth poorest SES quintile§               | 1.3        | <b>1.6</b>  | <b>1, 2.7</b>    | <b>0.05</b>        | 1.3        | 1.4         | 0.8, 2.2        | 0.189        |
| High-risk villages                         | <b>1.4</b> | <b>1.6</b>  | <b>1.2, 2.3</b>  | <b>0.007</b>       | <b>0.5</b> | 1.1         | 0.7, 1.5        | 0.727        |
| Jego Village¶                              | <b>0.5</b> |             |                  |                    | <b>0.6</b> |             |                 |              |
| Milalani Village¶                          | <b>0.7</b> |             |                  |                    | 0.95       |             |                 |              |
| Nganja Village¶                            | 1.1        |             |                  |                    | <b>1.8</b> |             |                 |              |

Crude odds ratios are presented for all variables explored in initial analysis stratified by sex. Bold variables are those variables that were significantly associated with anemia ( $P < 0.05$ ). Only those variables retained in the final GEE logistic model (accounting for household clustering) are shown with adjusted ORs, 95% CIs, and  $P$  values. Based on their significance compared with nested models, the final model included variables for 2-year age categories, *S. haematobium* intensity categories, filaria infection as a two-category present or absent variable, and categorical variables reflecting the presence of coinfections (*S. haematobium*–*Pf* malaria and hookworm–*Trichuris*); SES was obtained by analysis of asset scores obtained through PCA with households divided into SES quintiles.

\*Relative to oldest age group (17–18 years).

†Relative to uninfected.

‡Relative to single or no infection.

§Relative to highest (richest) SES.

||Relative to Vuga village.

¶Relative to low-risk villages (low *S. haematobium* prevalence).
